# Supplementary material
Source: PubMed Central journal article supplement (PMC6931177)
Supplement: 31484_Appendix_1.pdf [file 31484_Appendix_1.pdf]

Appendix 1

Figure A1. Strength training program video

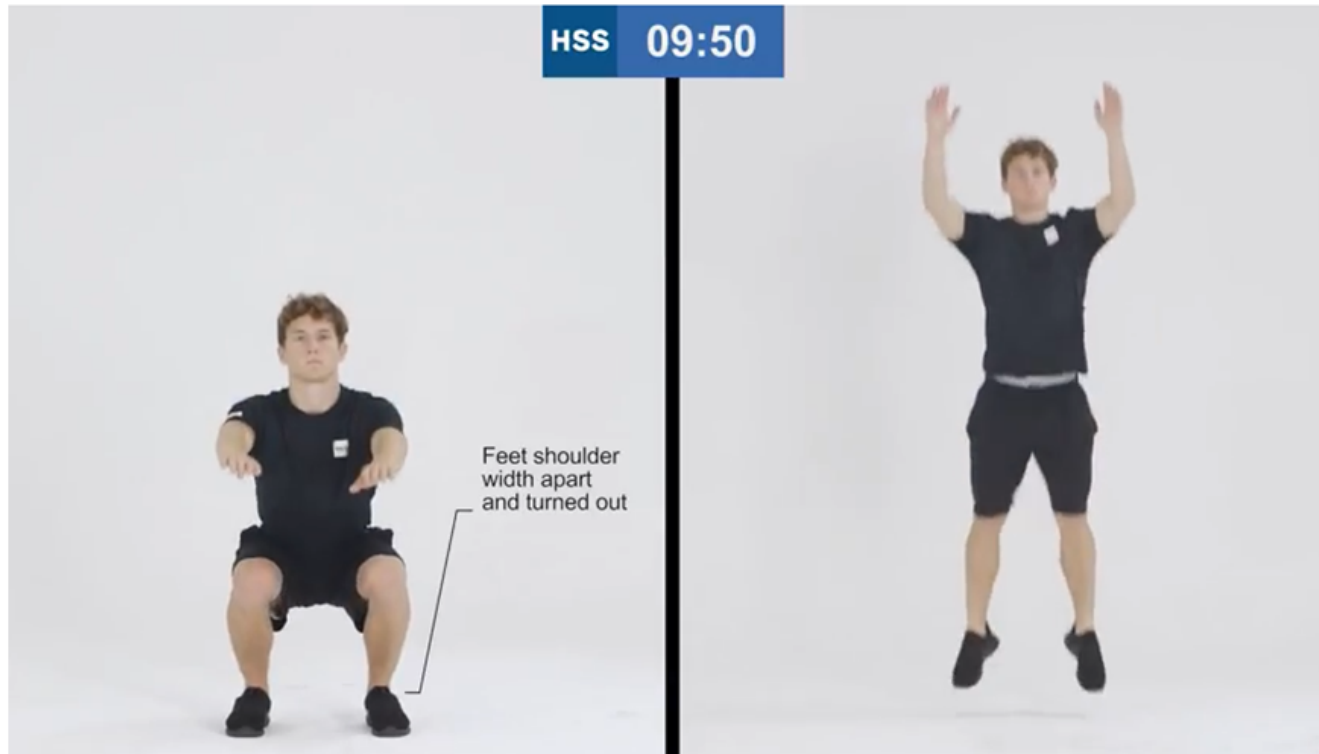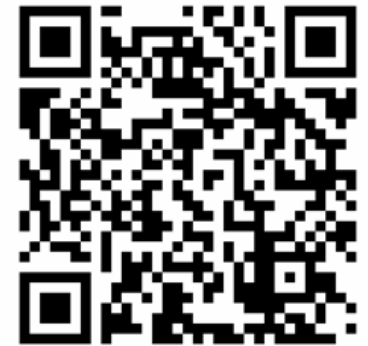

QR code to access the full strength training video online

Figure A2. Timeline of occurrence of major overuse injuries

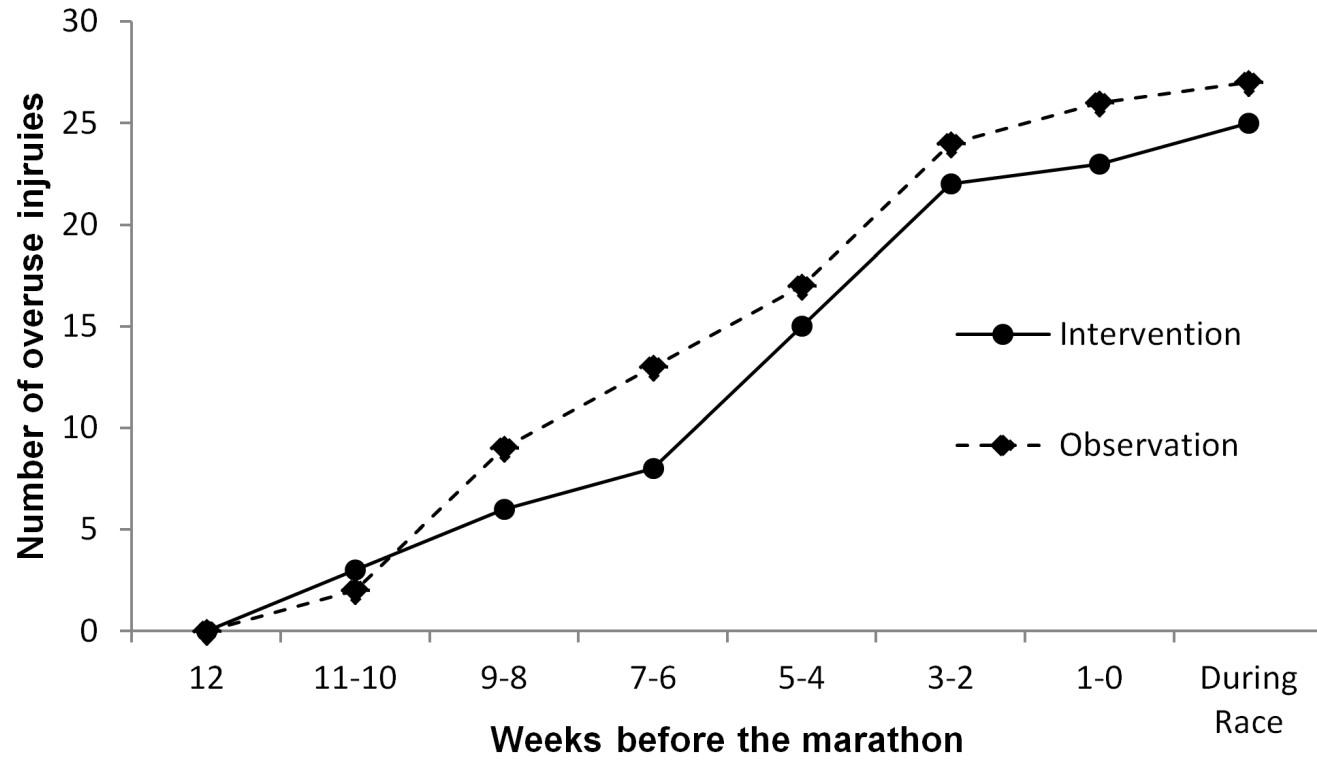

Table A1. Marathon completion and experience

| <b>Table A1. Marathon completion and experience</b> |                       |                          |                                |
|-----------------------------------------------------|-----------------------|--------------------------|--------------------------------|
|                                                     | <b>All Runners</b>    | <b>Observation Group</b> | <b>Strength Training Group</b> |
| Started marathon                                    | 583                   | 310                      | 273                            |
| Completed marathon (%)                              | 579 (99.3%)           | 308 (99.4%)              | 271 (99.3%)                    |
| Average finishing time                              | 4 hrs 59.2 min ± 57.4 | 4 hrs 57.5 min ± 54.5    | 5 hrs 1.1 min ± 60.4           |
| Miles walked                                        | 1.9 ± 3.2             | 1.9 ± 3.3                | 1.8 ± 3.0                      |
| Pace compared to goal                               |                       |                          |                                |
| Much faster than goal                               | 9 (1.5%)              | 2 (0.6%)                 | 7 (2.6%)                       |
| Faster than goal                                    | 60 (10.3%)            | 36 (11.6%)               | 24 (8.8%)                      |
| At goal pace                                        | 191 (32.8%)           | 97 (31.3%)               | 94 (34.4%)                     |
| Slower than goal                                    | 248 (42.5%)           | 137 (44.2%)              | 111 (40.7%)                    |
| Much slower than goal                               | 60 (10.3%)            | 34 (11%)                 | 26 (9.5%)                      |
| Did not respond                                     | 15 (2.6%)             | 4 (1.3%)                 | 11 (4%)                        |
| Average pain during marathon                        | 3.5 ± 1.6             | 3.6 ± 1.7                | 3.4 ± 1.5                      |
| Received medical services                           | 18 (3.1%)             | 12 (3.9%)                | 6 (2.2%)                       |
