# Supplementary material
Source: PubMed Central journal article supplement (PMC6931177)
Supplement: 31484_Appendix_2.pdf [file 31484_Appendix_2.pdf]

## Appendix 2

# 10-Minute Strengthening Program for Runners

### INSTRUCTIONS

- Your goal is to complete the exercise program at least 3 times per week.
- For each exercise, perform at a comfortable pace. If you complete an exercise before a minute has passed, rest until the start of the next minute.
- Begin with the “Beginner” exercises and move to the “Advanced” after successfully completing the exercises without difficulty.

| <b>Minute</b> | <b>Beginner</b>                                                                    | <b>Advanced</b>                                                           |
|---------------|------------------------------------------------------------------------------------|---------------------------------------------------------------------------|
| <b>0:00</b>   | <b>20 Regular Squats</b>                                                           | <b>20 Plyometric Jump Squats</b>                                          |
| <b>1:00</b>   | <b>20 Regular Squats</b>                                                           | <b>20 Plyometric Jump Squats</b>                                          |
| <b>2:00</b>   | <b>Front Plank</b> for as long as you are able                                     | <b>Front Plank</b> for 60 seconds                                         |
| <b>3:00</b>   | <b>10 Regular Lunges</b> on each side                                              | <b>10 Plyometric Lunges</b> on each side                                  |
| <b>4:00</b>   | <b>10 Regular Lunges</b> on each side                                              | <b>10 Plyometric Lunges</b> on each side                                  |
| <b>5:00</b>   | <b>Left Side Forearm Plank</b> with right leg straight for as long as you are able | <b>Left Side Forearm Plank</b> with right leg in abduction for 60 seconds |
| <b>6:00</b>   | <b>10 Regular Single Leg Toe Touches</b> on each side                              | <b>10 Plyometric Single Leg Toe Touches</b> on each side                  |
| <b>7:00</b>   | <b>10 Regular Single Leg Toe Touches</b> on each side                              | <b>10 Plyometric Single Leg Toe Touches</b> on each side                  |
| <b>8:00</b>   | <b>Right Side Forearm Plank</b> with left leg straight for as long as you are able | <b>Right Side Forearm Plank</b> with left leg in abduction for 60 seconds |
| <b>9:00</b>   | <b>20 Regular Squats</b>                                                           | <b>20 Plyometric Jump Squats</b>                                          |
